# Supplementary material
Source: PubMed Central journal article supplement (PMC3844426)
Supplement: NIHMS521071-supplement-2.pdf [file NIHMS521071-supplement-2.pdf]

George et al.

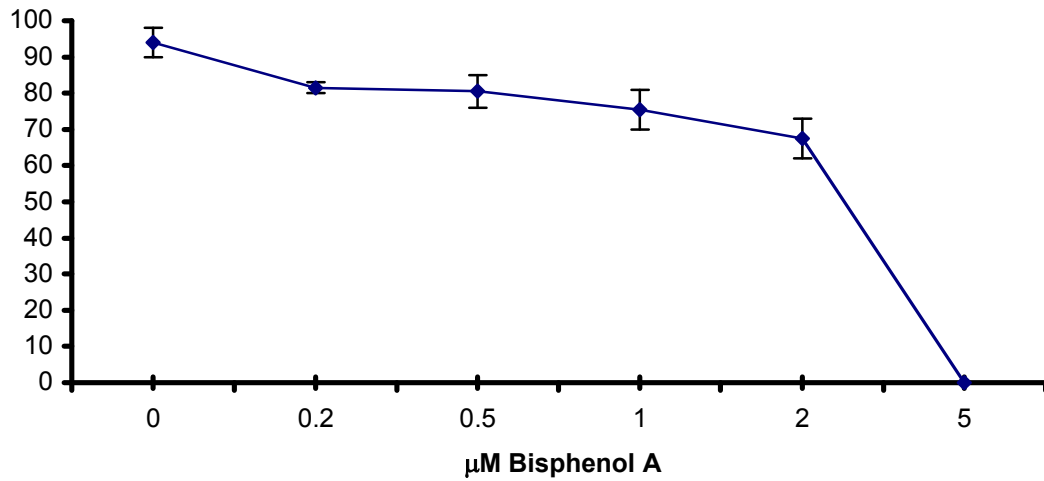

**Supplementary Figure 1. Bisphenol A disrupts sea urchin cell divisions in a dose-dependent manner.**

Dose response curve of sea urchin embryos exposed to BPA. *L. pictus* eggs exposed to either DMSO or increasing concentrations of Bisphenol A 20 minutes post fertilization and cultured for 2 hours. Each condition was performed in triplicate, and following the second division, 100 embryos were scored per well for successful cleavage.
