# Supplementary material
Source: PubMed Central journal article supplement (PMC3844426)
Supplement: NIHMS521071-supplement-3.pdf [file NIHMS521071-supplement-3.pdf]

**A**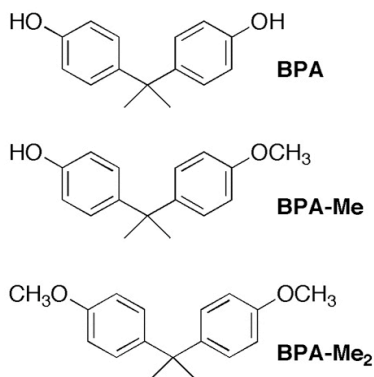**B**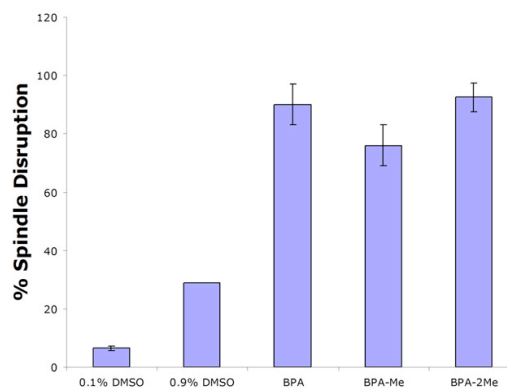

**Supplementary Figure 2. (PDF file) Methylated analogs of Bisphenol A disrupt mitotic spindle formation in a manner similar to the parent molecule.**

**Panel A.** Chemical structures of the parent molecule (BPA) and methylated analogs (BPA-Me and BPA-Me<sub>2</sub>). **Panel B.** HeLa cells were exposed to DMSO (either at 0.1% or 0.9%, the latter of which matches the carrier concentration in experimental treatments) or 200  $\mu$ M BPA, BPA-Me, or BPA-Me<sub>2</sub> for four hours, fixed and processed. Cells were then scored for alterations in bipolar spindle formation. When compared to the parent molecule, the methylated BPA analogs displayed similar capacities to induce ectopic spindle pole formation.
